# Supplementary material
Source: PubMed Central journal article supplement (PMC7880305)
Supplement: NIHMS1660709-supplement-Supplementaries.pdf [file NIHMS1660709-supplement-Supplementaries.pdf]

Correspondence

## **Unexpected failure rates for modular assembly of engineered zinc fingers**

Cherie L Ramirez, Jonathan E Foley, David A Wright, Felix Müller-Lerch, Shamim H Rahman, Tatjana I Cornu, Ronnie J Winfrey, Jeffrey D Sander, Fengli Fu, Jeffrey A Townsend, Toni Cathomen, Daniel F Voytas & J Keith Joung

Supplementary figures and text:

**Supplementary Figure 1** ZFNs induce highly efficient gene targeting events.

**Supplementary Figure 2** Schematic illustrating the “modular assembly” method of engineering multi-finger domains.

**Supplementary Figure 3** Schematic of the bacterial two-hybrid (B2H) reporter used to assess DNA-binding activities of zinc finger arrays.

**Supplementary Figure 4** The B2H assay identifies zinc-finger arrays that fail to show significant activity as ZFNs in human cells.

**Supplementary Table 1** Small-scale tests of modular assembly using various activity assays.

**Supplementary Table 2** Modularly assembled zinc finger arrays, cognate target binding sites, and their activities in the B2H assay.

**Supplementary Discussion**

**Supplementary Methods**

**Supplementary Figure 1** ZFNs induce highly efficient gene targeting events

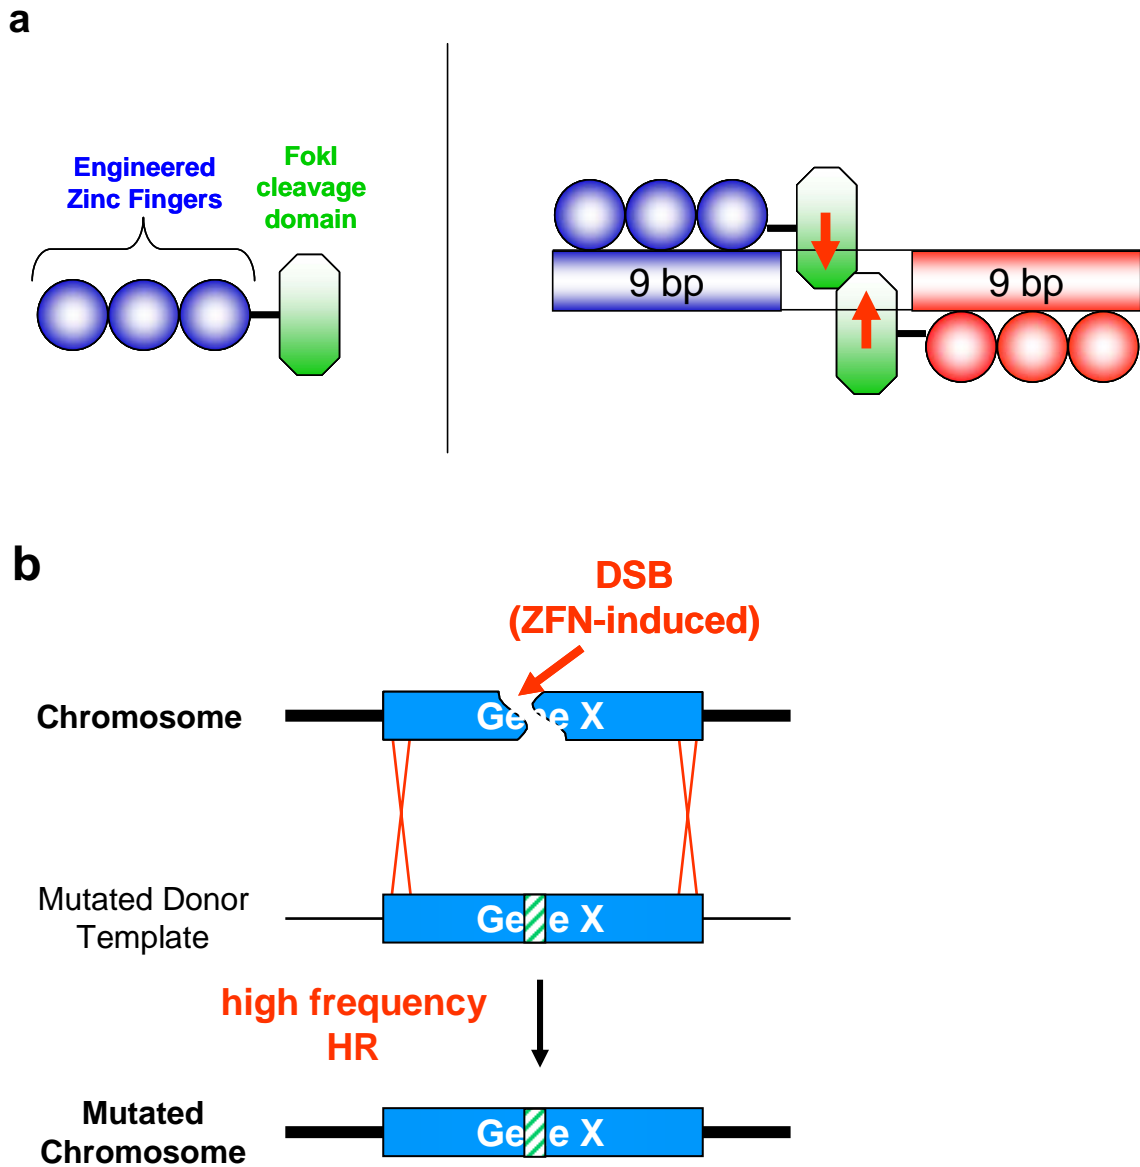

(a) Schematic of a ZFN monomer (left) and a pair of ZFNs cleaving DNA as a dimer (right).

(b) Schematic representing ZFN-enhanced recombination-based genome manipulation.

ZFNs introduce site-specific double-strand DNA breaks (DSBs) that can be harnessed to

mediate gene targeting via homologous recombination with an exogenously introduced “donor template.”

**Supplementary Figure 2** Schematic illustrating the “modular assembly” method of engineering multi-finger domains

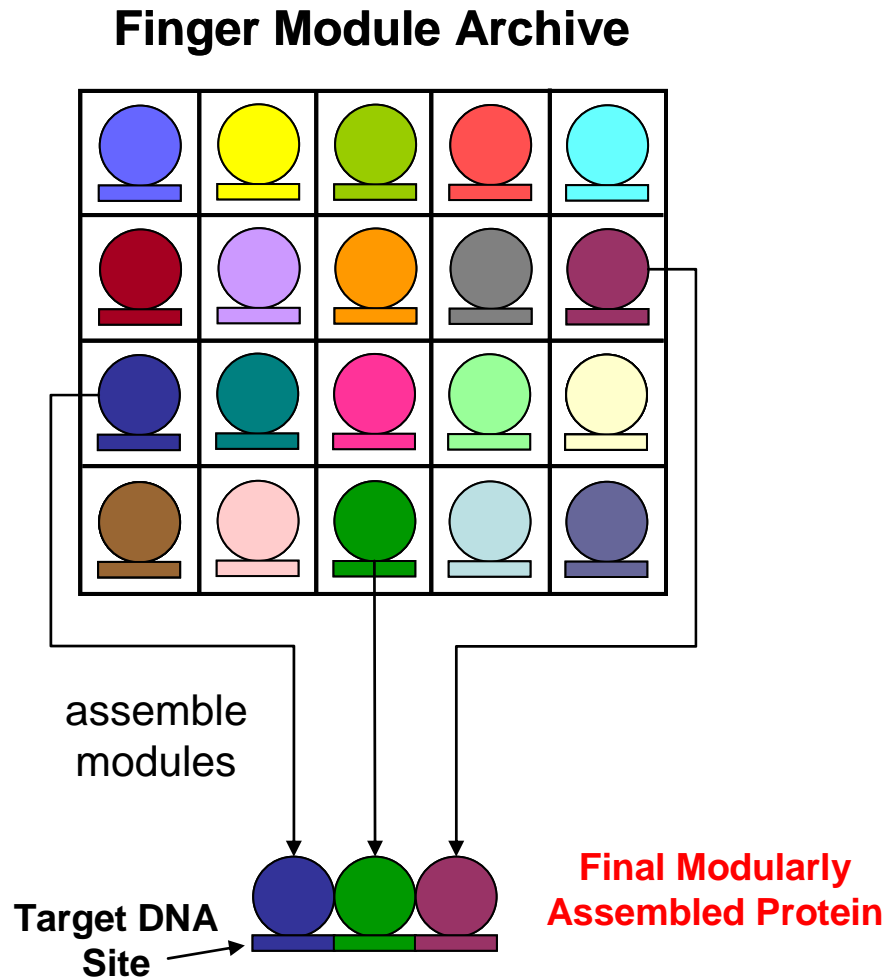

Fingers from archives of pre-characterized modules are joined together to create three-finger domains capable of recognizing a 9 bp target DNA site. Single fingers (colored spheres) recognize their cognate 3 bp “subsites” (colored rectangles).

**Supplementary Figure 3** Schematic of the bacterial two-hybrid (B2H) reporter used to assess DNA-binding activities of zinc finger arrays

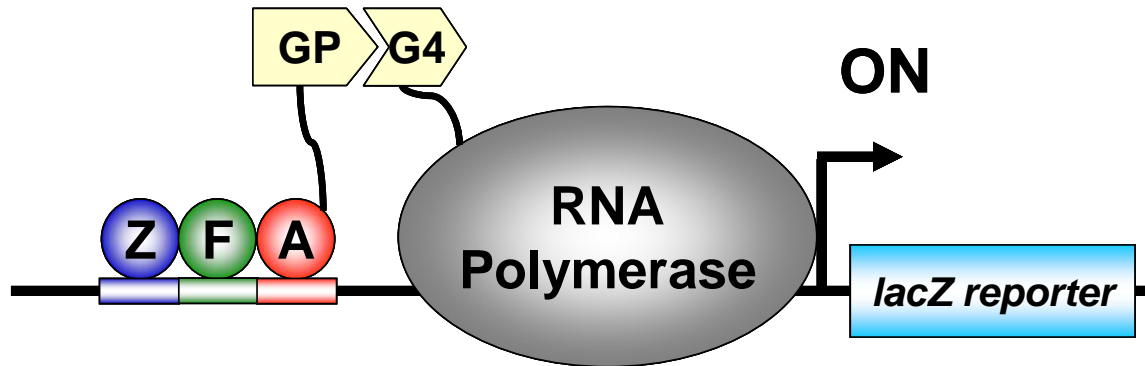

In the B2H assay, the ability of a zinc finger array to bind a target DNA site is reflected as increased expression of a *lacZ* reporter gene encoding  $\beta$ -galactosidase.<sup>1-3</sup> The B2H requires the expression of two hybrid proteins: one a fusion between the test zinc finger array (ZFA) and a fragment of the yeast Gal11 IP protein (GP) and the other a hybrid of the RNA polymerase  $\alpha$ -subunit and a fragment of the yeast Gal4 protein (G4). If the test ZFA binds to a target DNA site positioned upstream of a promoter, RNA polymerase complexes that have incorporated R $\alpha$  hybrid proteins are recruited to the promoter and expression of the downstream *lacZ* reporter is activated.

**Supplementary Figure 4** The B2H assay identifies zinc-finger arrays that fail to show significant activity as ZFNs in human cells

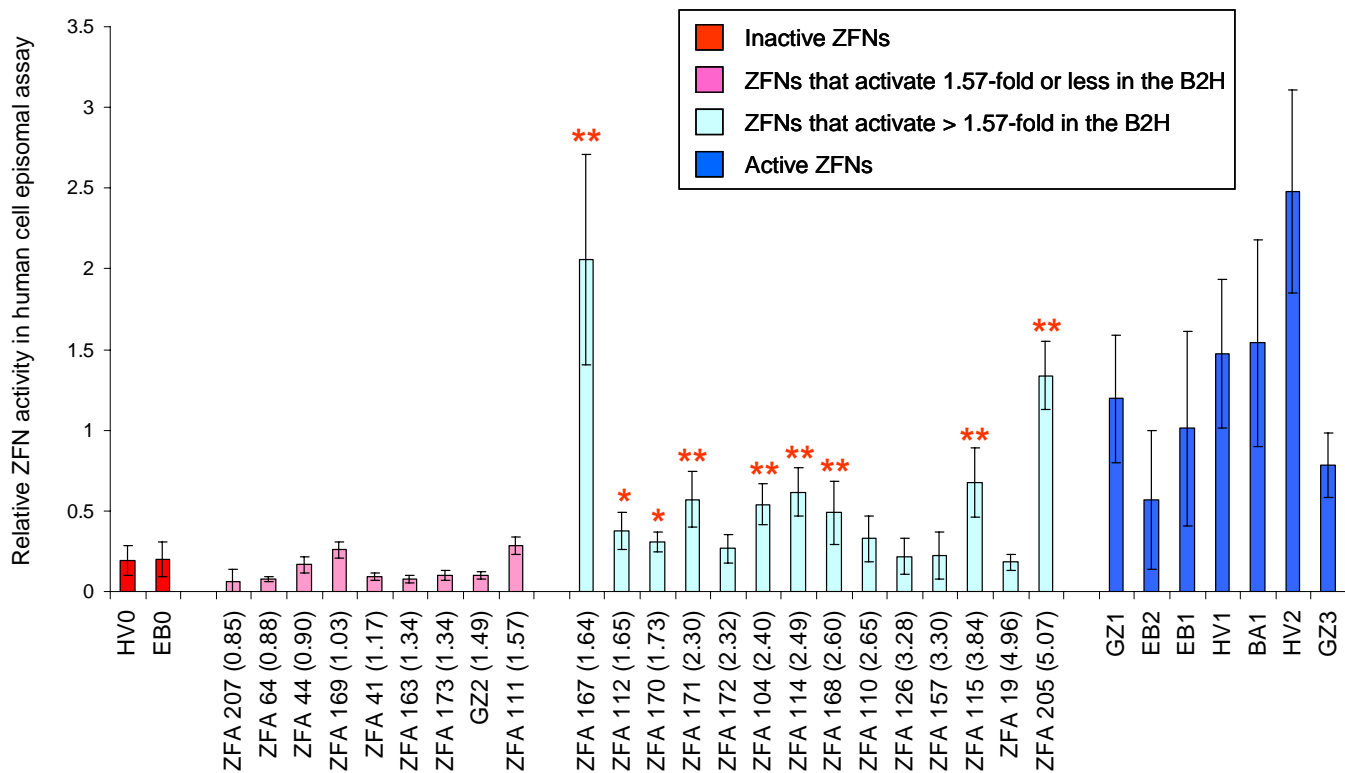

23 different zinc-finger arrays (pink and light blue bars) which activated transcription in the B2H assay to various levels (fold-activations are indicated in parentheses on the x-axis) were tested as homodimeric ZFNs using a previously described human cell-based episomal recombination (HR) assay.<sup>1</sup> The names of these 23 zinc-finger arrays are shown on the x-axis and details about their binding sites and the modules used to construct them can be found in **Supplementary Tables 1 and 2** online. ZFN activity is reported as a percentage of EGFP-rescue relative to an *I-SceI* control. In addition, the episomal repair activities of control ZFNs previously shown to lack or possess significant activity as ZFNs on chromosomal targets in human cells<sup>1</sup> are shown for comparison (red and blue bars, respectively). Names of the control ZFNs are shown on the x-axis and are as previously described.<sup>1</sup> Means of at least three independent experiments and standard deviations (error bars) are shown. ZFNs with mean episomal repair activities that are significantly higher

than that of the inactive EB0 ZFN are indicated with one ( $p<0.05$ ) or two ( $p<0.01$ ) red asterisks. The expression levels of all ZFNs shown were verified by Western blot using an antibody to a HA tag present on all proteins (data not shown).

Supplementary Figure 4 Reference:

1. Cornu, T. I. et al. DNA-binding Specificity Is a Major Determinant of the Activity and Toxicity of Zinc-finger Nucleases. *Mol Ther* **16**, 352-8 (2008).

**Supplementary Table 1** Small-scale tests of modular assembly using various activity assays

| ID#       | F1  | F2  | F3  | Target Sequence<br>(F3-F2-F1) | # GXX subsites | Activity* |         |
|-----------|-----|-----|-----|-------------------------------|----------------|-----------|---------|
|           |     |     |     |                               |                | Assay     | Results |
| ZFA 1     | 73  | 72  | 60  | 5'-GGT-GCT-GCC-3'             | 3              | EMSA      | -       |
| ZFA 2     | 72  | 72  | 106 | 5'-TGG-GCT-GCT-3'             | 2              | EMSA      | -       |
| ZFA 3     | 15  | 19  | 43  | 5'-GCT-GAC-GTG-3'             | 3              | EMSA      | -       |
| ZFA 4     | 14  | 30  | 53  | 5'-AGG-GTC-GTC-3'             | 2              | EMSA      | -       |
| ZFA 5     | 12  | 23  | 44  | 5'-GGA-GCG-GGT-3'             | 3              | EMSA      | -       |
| ZFA 6     | 64  | 73  | 63  | 5'-GAA-GCC-GAT-3'             | 3              | EMSA      | -       |
| ZFA 7     | 58  | 72  | 59  | 5'-GGA-GCT-GGG-3'             | 3              | EMSA      | -       |
| ZFA 8     | 67  | 60  | 64  | 5'-GAT-GGT-GTA-3'             | 3              | EMSA      | -       |
| ZFA 9     | 61  | 61  | 63  | 5'-GAA-GGC-GGC-3'             | 3              | EMSA      | -       |
| ZFA 10    | 70  | 61  | 59  | 5'-GGA-GGC-GCG-3'             | 3              | EMSA      | -       |
| ZFA 11    | 10  | 23  | 40  | 5'-GCA-GCG-GGC-3'             | 3              | EMSA      | -       |
| ZFA 12**  | 15  | 19  | 43  | 5'-GCT-GAC-GTG-3'             | 3              | EMSA      | -       |
| ZFA 13**  | 4   | 21  | 39  | 5'-GAT-GAT-GAT-3'             | 3              | EMSA      | -       |
| ZFA 14**  | 15  | 31  | 132 | 5'-AGG-GTG-GTG-3'             | 2              | EMSA      | -       |
| ZFA 15    | 61  | 70  | 71  | 5'-GCA-GCG-GGC-3'             | 3              | EMSA      | +       |
| ZFA 16    | 62  | 68  | 63  | 5'-GAA-GTT-GAG-3'             | 3              | EMSA      | +       |
| ZFA 17    | 60  | 70  | 59  | 5'-GGA-GCG-GGT-3'             | 3              | EMSA      | +       |
| ZFA 18    | 67  | 66  | 65  | 5'-GAC-GTG-GTA-3'             | 3              | EMSA      | +       |
| ZFA 19    | 66  | 66  | 84  | 5'-AGG-GTG-GTG-3'             | 2              | EMSA      | +       |
| ZFA 20    | 62  | 62  | 62  | 5'-GAG-GAG-GAG-3'             | 3              | EMSA      | +       |
| ZFA 21**  | 67  | 31  | 65  | 5'-GAC-GTG-GTA-3'             | 3              | EMSA      | -       |
|           |     |     |     |                               |                | PSSA      | -       |
| ZFA 22**  | 8   | 24  | 57  | 5'-TGG-GCT-GCT-3'             | 2              | EMSA      | -       |
|           |     |     |     |                               |                | PSSA      | -       |
| ZFA 23    | 15  | 31  | 49  | 5'-GTG-GTG-GTG-3'             | 3              | EMSA      | -       |
|           |     |     |     |                               |                | PSSA      | -       |
| ZFA 24**  | 8   | 24  | 43  | 5'-GCT-GCT-GCT-3'             | 3              | EMSA      | -       |
|           |     |     |     |                               |                | PSSA      | -       |
| ZFA 25**  | 15  | 31  | 84  | 5'-AGG-GTG-GTG-3'             | 2              | EMSA      | -       |
|           |     |     |     |                               |                | PSSA      | -       |
| ZFA 26**  | 15  | 31  | 84  | 5'-AGG-GTG-GTG-3'             | 2              | PSSA      | -       |
| ZFA 27**  | 13  | 31  | 37  | 5'-GAC-GTG-GTA-3'             | 3              | PSSA      | -       |
| ZFA 28*** | 61  | 65  | 65  | 5'-GAC-GAC-GGC-3'             | 3              | HR        | -       |
|           |     |     |     |                               |                | EMSA      | -       |
| ZFA 29    | 100 | 96  | 75  | 5'-AAC-CCT-CGT-3'             | 0              | HR        | -       |
| ZFA 30    | 61  | 80  | 61  | 5'-GGC-ACG-GGC-3'             | 2              | HR        | -       |
| ZFA 31    | 91  | 104 | 85  | 5'-AGT-TAG-CAG-3'             | 0              | HR        | -       |
| ZFA 32    | 83  | 103 | 104 | 5'-TAG-CTT-AGC-3'             | 0              | HR        | -       |
| ZFA 33    | 83  | 68  | 74  | 5'-AAA-GTT-AGC-3'             | 1              | HR        | -       |
| ZFA 34    | 100 | 104 | 72  | 5'-GCT-TAG-CGT-3'             | 1              | HR        | -       |
| ZFA 35    | 17  | 25  | 119 | 5'-AGA-GGA-AGA-3'             | 1              | HR        | -       |
| ZFA 36*** | 60  | 64  | 63  | 5'-GAA-GAT-GGT-3'             | 3              | HR        | +       |
|           |     |     |     |                               |                | EMSA      | +       |



Thirty-six three-finger arrays (named “ZFA \_\_\_” for zinc finger array) were assembled using modules based on the Zinc Finger Consortium Modular Assembly Kit 1.0,<sup>1</sup> and the identities of the three modules used to construct each three-finger array use the Consortium numbering scheme (F1, F2, and F3 are the amino-terminal, middle, and carboxy-terminal fingers, respectively). All target binding sites are written 5’ to 3’ (note that the F3 module binds to the 5’ most triplet subsite while F1 binds to the 3’ most triplet subsite). The number of GXX subsites in each target site is also indicated. For nine of the arrays, the amino acid sequence of the zinc finger backbone differs from the modules in the archive. These arrays are noted in the far left column by a double asterisk, and their complete amino acid sequences are available upon request.

Activity of 27 arrays was tested by electrophoretic mobility shift assays (EMSA). A plus sign in the far right column indicates that the finger array caused a shift in mobility of a double-stranded oligonucleotide corresponding to the intended target sequence on polyacrylamide gels. In all cases, binding could be competed away with an excess of the target oligonucleotide. Western blots were performed for all zinc finger arrays to ensure they were expressed.

Plant single-strand annealing (PSSA) assays (see **Supplementary Methods** online) were used to assess function of seven arrays, five of which were also tested by EMSA. The PSSA assay tests the ability of the zinc finger array to function as a ZFN. A minus sign in the table indicates that activity was comparable to negative controls in which plant protoplasts were not transformed with the ZFN construct.

An episomal recombination (HR) assay was used to assess the activity of nine ZFNs in human 293T cells (see **Supplementary Methods** online). A plus sign indicates that ZFN activity in stimulating HR was >40% as compared to the activity of a control I-SceI meganuclease on the

same target locus.

\*EMSA, electrophoretic mobility shift assay; a positive value indicates DNA binding that could be competed away by an excess of an oligonucleotide corresponding to the target site. PSSA, plant single-strand annealing assay; a positive value indicates reporter gene function that is at least two-fold over background controls. HR, episomal recombination assay; a positive value indicates at least 40% activity as compared to I-*SceI* on the same target template. For further information on the activity assays, see **Supplementary Methods** online.

\*\*Finger arrays with backbone sequences that differ from the ZF finger archive.

\*\*\*Finger arrays previously described.<sup>2</sup>

Reference for Supplementary Table 1:

1. Wright, D. A. et al. Standardized reagents and protocols for engineering zinc finger nucleases by modular assembly. *Nat Protoc* **1**, 1637-52 (2006).
2. Alwin, S. et al. Custom zinc-finger nucleases for use in human cells. *Mol Ther* **12**, 610-7 (2005).

**Supplementary Table 2** Modularly assembled zinc finger arrays, cognate target binding sites, and their activities in the B2H assay

| ID#    | F1  | F2  | F3  | Module Source | Target Sequence (F3-F2-F1) | # GXX subsites | B2H fold activation (mean) | SEM   |
|--------|-----|-----|-----|---------------|----------------------------|----------------|----------------------------|-------|
| ZFA 37 | 75  | 75  | 74  | B             | 5'-AAA-AAC-AAC-3'          | 0              | 1.152                      | 0.030 |
| ZFA 38 | 91  | 78  | 74  | B             | 5'-AAA-ACA-CAG-3'          | 0              | 1.097                      | 0.030 |
| ZFA 39 | 73  | 91  | 74  | B             | 5'-AAA-CAG-GCC-3'          | 1              | 1.325                      | 0.095 |
| ZFA 40 | 100 | 101 | 74  | B             | 5'-AAA-CTA-CGT-3'          | 0              | 1.347                      | 0.037 |
| ZFA 41 | 83  | 68  | 74  | B             | 5'-AAA-GTT-AGC-3'          | 1              | 1.166                      | 0.106 |
| ZFA 42 | 91  | 93  | 75  | B             | 5'-AAC-CCA-CAG-3'          | 0              | 0.974                      | 0.075 |
| ZFA 43 | 68  | 93  | 75  | B             | 5'-AAC-CCA-GTT-3'          | 1              | 0.980                      | 0.010 |
| ZFA 44 | 100 | 96  | 75  | B             | 5'-AAC-CCT-CGT-3'          | 0              | 0.900                      | 0.105 |
| ZFA 45 | 64  | 86  | 77  | B             | 5'-AAT-ATA-GAT-3'          | 1              | 1.606                      | 0.037 |
| ZFA 46 | 90  | 75  | 78  | B             | 5'-ACA-AAC-CAC-3'          | 0              | 0.850                      | 0.022 |
| ZFA 47 | 85  | 75  | 79  | B             | 5'-ACC-AAC-AGT-3'          | 0              | 1.001                      | 0.028 |
| ZFA 48 | 86  | 83  | 79  | B             | 5'-ACC-AGC-ATA-3'          | 0              | 1.036                      | 0.028 |
| ZFA 49 | 83  | 100 | 79  | B             | 5'-ACC-CGT-AGC-3'          | 0              | 1.235                      | 0.016 |
| ZFA 50 | 63  | 59  | 79  | B             | 5'-ACC-GGA-GAA-3'          | 2              | 1.386                      | 0.068 |
| ZFA 51 | 91  | 83  | 80  | B             | 5'-ACG-AGC-CAG-3'          | 0              | 0.955                      | 0.027 |
| ZFA 52 | 72  | 91  | 80  | B             | 5'-ACG-CAG-GCT-3'          | 1              | 1.236                      | 0.007 |
| ZFA 53 | 70  | 95  | 80  | B             | 5'-ACG-CCG-GCG-3'          | 1              | 1.266                      | 0.040 |
| ZFA 54 | 100 | 65  | 80  | B             | 5'-ACG-GAC-CGT-3'          | 1              | 1.799                      | 0.060 |
| ZFA 55 | 71  | 73  | 80  | B             | 5'-ACG-GCC-GCA-3'          | 2              | 1.295                      | 0.031 |
| ZFA 56 | 82  | 59  | 82  | B             | 5'-AGA-GGA-AGA-3'          | 1              | 1.287                      | 0.021 |
| ZFA 57 | 119 | 117 | 119 | T             | 5'-AGA-GGA-AGA-3'          | 1              | 0.911                      | 0.012 |
| ZFA 58 | 119 | 114 | 119 | T             | 5'-AGA-GGA-AGA-3'          | 1              | 1.928                      | 0.082 |
| ZFA 59 | 119 | 129 | 119 | T             | 5'-AGA-GGA-AGA-3'          | 1              | 1.974                      | 0.066 |
| ZFA 60 | 119 | 118 | 119 | T             | 5'-AGA-GGA-AGA-3'          | 1              | 2.371                      | 0.047 |
| ZFA 61 | 64  | 69  | 83  | B             | 5'-AGC-GTC-GAT-3'          | 2              | 1.206                      | 0.019 |
| ZFA 62 | 103 | 88  | 85  | B             | 5'-AGT-ATT-CTT-3'          | 0              | 1.015                      | 0.022 |
| ZFA 64 | 91  | 104 | 85  | B             | 5'-AGT-TAG-CAG-3'          | 0              | 0.879                      | 0.092 |
| ZFA 65 | 85  | 93  | 86  | B             | 5'-ATA-CCA-AGT-3'          | 0              | 0.989                      | 0.017 |
| ZFA 66 | 78  | 81  | 87  | B             | 5'-ATG-ACT-ACA-3'          | 0              | 0.956                      | 0.043 |
| ZFA 67 | 92  | 90  | 87  | B             | 5'-ATG-CAC-CAT-3'          | 0              | 1.122                      | 0.068 |
| ZFA 68 | 78  | 96  | 88  | B             | 5'-ATT-CCT-ACA-3'          | 0              | 1.064                      | 0.135 |
| ZFA 69 | 95  | 72  | 88  | B             | 5'-ATT-GCT-CCG-3'          | 1              | 1.256                      | 0.016 |
| ZFA 70 | 63  | 98  | 90  | B             | 5'-CAC-CGC-GAA-3'          | 1              | 1.099                      | 0.011 |
| ZFA 71 | 60  | 67  | 90  | B             | 5'-CAC-GTA-GGT-3'          | 2              | 1.476                      | 0.023 |
| ZFA 72 | 86  | 98  | 92  | B             | 5'-CAT-CGC-ATA-3'          | 0              | 0.985                      | 0.027 |
| ZFA 74 | 90  | 100 | 93  | B             | 5'-CCA-CGT-CAC-3'          | 0              | 1.173                      | 0.034 |
| ZFA 75 | 73  | 64  | 93  | B             | 5'-CCA-GAT-GCC-3'          | 2              | 1.085                      | 0.006 |
| ZFA 76 | 103 | 85  | 94  | B             | 5'-CCC-AGT-CTT-3'          | 0              | 1.376                      | 0.153 |
| ZFA 77 | 66  | 100 | 94  | B             | 5'-CCC-CGT-GTG-3'          | 1              | 1.431                      | 0.069 |
| ZFA 78 | 80  | 79  | 95  | B             | 5'-CCG-ACC-ACG-3'          | 0              | 1.090                      | 0.020 |
| ZFA 79 | 74  | 91  | 95  | B             | 5'-CCG-CAG-AAA-3'          | 0              | 1.123                      | 0.009 |
| ZFA 80 | 100 | 98  | 95  | B             | 5'-CCG-CGC-CGT-3'          | 0              | 1.146                      | 0.074 |
| ZFA 81 | 86  | 63  | 95  | B             | 5'-CCG-GAA-ATA-3'          | 1              | 0.907                      | 0.048 |
| ZFA 82 | 91  | 80  | 96  | B             | 5'-CCT-ACG-CAG-3'          | 0              | 1.013                      | 0.037 |
| ZFA 83 | 90  | 81  | 96  | B             | 5'-CCT-ACT-CAC-3'          | 0              | 1.113                      | 0.042 |
| ZFA 84 | 70  | 87  | 96  | B             | 5'-CCT-ATG-GCG-3'          | 1              | 1.239                      | 0.104 |
| ZFA 85 | 58  | 67  | 96  | B             | 5'-CCT-GTA-GGG-3'          | 2              | 1.504                      | 0.009 |

|         |     |     |     |   |                   |   |       |       |
|---------|-----|-----|-----|---|-------------------|---|-------|-------|
| ZFA 86  | 101 | 92  | 98  | B | 5'-CGC-CAT-CTA-3' | 0 | 1.052 | 0.052 |
| ZFA 87  | 88  | 81  | 101 | B | 5'-CTA-ACT-ATT-3' | 0 | 0.884 | 0.013 |
| ZFA 88  | 83  | 59  | 101 | B | 5'-CTA-GGA-AGC-3' | 1 | 1.303 | 0.089 |
| ZFA 89  | 80  | 83  | 103 | B | 5'-CTT-AGC-ACG-3' | 0 | 1.037 | 0.086 |
| ZFA 90  | 94  | 88  | 103 | B | 5'-CTT-ATT-CCC-3' | 0 | 1.031 | 0.018 |
| ZFA 91  | 91  | 60  | 103 | B | 5'-CTT-GGT-CAG-3' | 1 | 1.044 | 0.032 |
| ZFA 92  | 69  | 70  | 63  | B | 5'-GAA-GCG-GTC-3' | 3 | 2.309 | 0.129 |
| ZFA 93  | 14  | 23  | 36  | S | 5'-GAA-GCG-GTC-3' | 3 | 1.620 | 0.059 |
| ZFA 94  | 109 | 130 | 124 | T | 5'-GAA-GCG-GTC-3' | 3 | 1.339 | 0.165 |
| ZFA 95  | 109 | 130 | 122 | T | 5'-GAA-GCG-GTC-3' | 3 | 2.279 | 0.123 |
| ZFA 96  | 87  | 94  | 65  | B | 5'-GAC-CCC-ATG-3' | 1 | 1.074 | 0.034 |
| ZFA 97  | 72  | 61  | 65  | B | 5'-GAC-GGC-GCT-3' | 3 | 1.118 | 0.045 |
| ZFA 98  | 8   | 26  | 37  | S | 5'-GAC-GGC-GCT-3' | 3 | 0.930 | 0.039 |
| ZFA 101 | 4   | 24  | 38  | S | 5'-GAG-GCT-GAT-3' | 3 | 1.327 | 0.126 |
| ZFA 102 | 112 | 139 | 113 | T | 5'-GAG-GCT-GAT-3' | 3 | 1.142 | 0.091 |
| ZFA 103 | 112 | 139 | 136 | T | 5'-GAG-GCT-GAT-3' | 3 | 1.185 | 0.087 |
| ZFA 104 | 112 | 139 | 115 | T | 5'-GAG-GCT-GAT-3' | 3 | 2.399 | 0.120 |
| ZFA 105 | 66  | 72  | 62  | B | 5'-GAG-GCT-GTG-3' | 3 | 4.553 | 0.295 |
| ZFA 106 | 15  | 24  | 38  | S | 5'-GAG-GCT-GTG-3' | 3 | 3.038 | 0.153 |
| ZFA 107 | 138 | 139 | 136 | T | 5'-GAG-GCT-GTG-3' | 3 | 0.959 | 0.026 |
| ZFA 108 | 138 | 139 | 113 | T | 5'-GAG-GCT-GTG-3' | 3 | 1.004 | 0.037 |
| ZFA 109 | 138 | 139 | 115 | T | 5'-GAG-GCT-GTG-3' | 3 | 3.277 | 0.153 |
| ZFA 110 | 68  | 59  | 64  | B | 5'-GAT-GGA-GTT-3' | 3 | 2.647 | 0.158 |
| ZFA 111 | 16  | 25  | 39  | S | 5'-GAT-GGA-GTT-3' | 3 | 1.571 | 0.111 |
| ZFA 112 | 111 | 118 | 112 | T | 5'-GAT-GGA-GTT-3' | 3 | 1.645 | 0.071 |
| ZFA 113 | 111 | 129 | 112 | T | 5'-GAT-GGA-GTT-3' | 3 | 2.013 | 0.083 |
| ZFA 114 | 111 | 117 | 112 | T | 5'-GAT-GGA-GTT-3' | 3 | 2.489 | 0.136 |
| ZFA 115 | 111 | 114 | 112 | T | 5'-GAT-GGA-GTT-3' | 3 | 3.840 | 0.308 |
| ZFA 116 | 58  | 60  | 64  | B | 5'-GAT-GGT-GGG-3' | 3 | 2.390 | 0.065 |
| ZFA 117 | 11  | 28  | 39  | S | 5'-GAT-GGT-GGG-3' | 3 | 0.959 | 0.098 |
| ZFA 118 | 131 | 140 | 112 | T | 5'-GAT-GGT-GGG-3' | 3 | 1.985 | 0.067 |
| ZFA 119 | 133 | 140 | 112 | T | 5'-GAT-GGT-GGG-3' | 3 | 2.444 | 0.103 |
| ZFA 120 | 134 | 140 | 112 | T | 5'-GAT-GGT-GGG-3' | 3 | 6.665 | 0.290 |
| ZFA 121 | 60  | 78  | 71  | B | 5'-GCA-ACA-GGT-3' | 2 | 1.388 | 0.014 |
| ZFA 122 | 100 | 80  | 71  | B | 5'-GCA-ACG-CGT-3' | 1 | 1.274 | 0.031 |
| ZFA 123 | 81  | 90  | 71  | B | 5'-GCA-CAC-ACT-3' | 1 | 0.851 | 0.023 |
| ZFA 124 | 59  | 73  | 71  | B | 5'-GCA-GCC-GGA-3' | 3 | 1.574 | 0.099 |
| ZFA 125 | 9   | 33  | 40  | S | 5'-GCA-GCC-GGA-3' | 3 | 0.953 | 0.111 |
| ZFA 126 | 71  | 70  | 71  | B | 5'-GCA-GCG-GCA-3' | 3 | 3.276 | 0.111 |
| ZFA 127 | 5   | 23  | 40  | S | 5'-GCA-GCG-GCA-3' | 3 | 0.887 | 0.068 |
| ZFA 128 | 58  | 72  | 71  | B | 5'-GCA-GCT-GGG-3' | 3 | 1.186 | 0.045 |
| ZFA 129 | 11  | 24  | 40  | S | 5'-GCA-GCT-GGG-3' | 3 | 1.157 | 0.039 |
| ZFA 130 | 65  | 69  | 71  | B | 5'-GCA-GTC-GAC-3' | 3 | 0.867 | 0.046 |
| ZFA 131 | 2   | 30  | 40  | S | 5'-GCA-GTC-GAC-3' | 3 | 0.897 | 0.052 |
| ZFA 132 | 72  | 69  | 71  | B | 5'-GCA-GTC-GCT-3' | 3 | 1.365 | 0.049 |
| ZFA 133 | 8   | 30  | 40  | S | 5'-GCA-GTC-GCT-3' | 3 | 1.116 | 0.092 |
| ZFA 134 | 61  | 69  | 71  | B | 5'-GCA-GTC-GGC-3' | 3 | 1.077 | 0.024 |
| ZFA 135 | 10  | 30  | 40  | S | 5'-GCA-GTC-GGC-3' | 3 | 0.999 | 0.039 |
| ZFA 136 | 70  | 66  | 71  | B | 5'-GCA-GTG-GCG-3' | 3 | 1.915 | 0.050 |
| ZFA 137 | 7   | 31  | 40  | S | 5'-GCA-GTG-GCG-3' | 3 | 0.819 | 0.051 |
| ZFA 138 | 95  | 79  | 73  | B | 5'-GCC-ACC-CCG-3' | 1 | 1.000 | 0.032 |
| ZFA 139 | 59  | 87  | 73  | B | 5'-GCC-ATG-GGA-3' | 2 | 0.974 | 0.043 |
| ZFA 140 | 103 | 63  | 73  | B | 5'-GCC-GAA-CTT-3' | 2 | 1.137 | 0.057 |

|         |     |     |     |   |                   |   |       |       |
|---------|-----|-----|-----|---|-------------------|---|-------|-------|
| ZFA 141 | 66  | 71  | 73  | B | 5'-GCC-GCA-GTG-3' | 3 | 1.061 | 0.036 |
| ZFA 142 | 15  | 22  | 41  | S | 5'-GCC-GCA-GTG-3' | 3 | 0.914 | 0.023 |
| ZFA 143 | 59  | 61  | 73  | B | 5'-GCC-GGC-GGA-3' | 3 | 1.182 | 0.049 |
| ZFA 144 | 9   | 26  | 41  | S | 5'-GCC-GGC-GGA-3' | 3 | 0.814 | 0.021 |
| ZFA 145 | 132 | 116 | 130 | T | 5'-GCG-GAA-AGG-3' | 2 | 1.342 | 0.134 |
| ZFA 146 | 132 | 124 | 130 | T | 5'-GCG-GAA-AGG-3' | 2 | 1.736 | 0.063 |
| ZFA 147 | 132 | 122 | 130 | T | 5'-GCG-GAA-AGG-3' | 2 | 1.759 | 0.054 |
| ZFA 148 | 132 | 123 | 130 | T | 5'-GCG-GAA-AGG-3' | 2 | 2.136 | 0.064 |
| ZFA 149 | 102 | 59  | 70  | B | 5'-GCG-GGA-CTG-3' | 2 | 1.522 | 0.088 |
| ZFA 150 | 59  | 66  | 70  | B | 5'-GCG-GTG-GGA-3' | 3 | 1.751 | 0.124 |
| ZFA 151 | 9   | 31  | 42  | S | 5'-GCG-GTG-GGA-3' | 3 | 2.774 | 0.116 |
| ZFA 152 | 114 | 138 | 130 | T | 5'-GCG-GTG-GGA-3' | 3 | 1.029 | 0.046 |
| ZFA 153 | 129 | 138 | 130 | T | 5'-GCG-GTG-GGA-3' | 3 | 1.272 | 0.039 |
| ZFA 154 | 118 | 138 | 130 | T | 5'-GCG-GTG-GGA-3' | 3 | 1.384 | 0.059 |
| ZFA 155 | 117 | 138 | 130 | T | 5'-GCG-GTG-GGA-3' | 3 | 1.953 | 0.050 |
| ZFA 156 | 60  | 66  | 70  | B | 5'-GCG-GTG-GGT-3' | 3 | 2.229 | 0.208 |
| ZFA 157 | 12  | 31  | 42  | S | 5'-GCG-GTG-GGT-3' | 3 | 3.298 | 0.266 |
| ZFA 158 | 70  | 106 | 70  | B | 5'-GCG-TGG-GCG-3' | 2 | 2.713 | 0.181 |
| ZFA 159 | 7   | 34  | 42  | S | 5'-GCG-TGG-GCG-3' | 2 | 0.856 | 0.034 |
| ZFA 160 | 78  | 86  | 72  | B | 5'-GCT-ATA-ACA-3' | 1 | 0.988 | 0.024 |
| ZFA 161 | 62  | 100 | 72  | B | 5'-GCT-CGT-GAG-3' | 2 | 1.703 | 0.012 |
| ZFA 163 | 100 | 104 | 72  | B | 5'-GCT-TAG-CGT-3' | 1 | 1.343 | 0.143 |
| ZFA 164 | 61  | 74  | 59  | B | 5'-GGA-AAA-GGC-3' | 2 | 1.392 | 0.084 |
| ZFA 165 | 92  | 90  | 59  | B | 5'-GGA-CAC-CAT-3' | 1 | 1.182 | 0.016 |
| ZFA 166 | 80  | 101 | 59  | B | 5'-GGA-CTA-ACG-3' | 1 | 1.085 | 0.034 |
| ZFA 167 | 66  | 70  | 59  | B | 5'-GGA-GCG-GTG-3' | 3 | 1.640 | 0.043 |
| ZFA 168 | 15  | 23  | 44  | S | 5'-GGA-GCG-GTG-3' | 3 | 2.599 | 0.092 |
| ZFA 169 | 138 | 130 | 117 | T | 5'-GGA-GCG-GTG-3' | 3 | 1.027 | 0.068 |
| ZFA 170 | 138 | 130 | 118 | T | 5'-GGA-GCG-GTG-3' | 3 | 1.732 | 0.041 |
| ZFA 171 | 138 | 130 | 129 | T | 5'-GGA-GCG-GTG-3' | 3 | 2.296 | 0.121 |
| ZFA 172 | 138 | 130 | 114 | T | 5'-GGA-GCG-GTG-3' | 3 | 2.316 | 0.046 |
| ZFA 173 | 61  | 80  | 61  | B | 5'-GGC-ACG-GGC-3' | 2 | 1.341 | 0.109 |
| ZFA 174 | 63  | 95  | 61  | B | 5'-GGC-CCG-GAA-3' | 2 | 1.171 | 0.030 |
| ZFA 175 | 66  | 73  | 61  | B | 5'-GGC-GCC-GTG-3' | 3 | 1.116 | 0.072 |
| ZFA 176 | 15  | 33  | 45  | S | 5'-GGC-GCC-GTG-3' | 3 | 0.868 | 0.017 |
| ZFA 177 | 73  | 58  | 61  | B | 5'-GGC-GGG-GCC-3' | 3 | 1.203 | 0.035 |
| ZFA 178 | 6   | 27  | 45  | S | 5'-GGC-GGG-GCC-3' | 3 | 1.258 | 0.053 |
| ZFA 180 | 61  | 70  | 58  | B | 5'-GGG-GCG-GGC-3' | 3 | 2.191 | 0.105 |
| ZFA 181 | 10  | 23  | 51  | S | 5'-GGG-GCG-GGC-3' | 3 | 6.162 | 0.147 |
| ZFA 182 | 73  | 72  | 58  | B | 5'-GGG-GCT-GCC-3' | 3 | 1.363 | 0.053 |
| ZFA 183 | 6   | 24  | 51  | S | 5'-GGG-GCT-GCC-3' | 3 | 1.494 | 0.054 |
| ZFA 184 | 108 | 139 | 134 | T | 5'-GGG-GCT-GCC-3' | 3 | 2.022 | 0.253 |
| ZFA 185 | 79  | 88  | 60  | B | 5'-GGT-ATT-ACC-3' | 1 | 1.078 | 0.016 |
| ZFA 186 | 72  | 63  | 60  | B | 5'-GGT-GAA-GCT-3' | 3 | 1.589 | 0.094 |
| ZFA 187 | 8   | 18  | 46  | S | 5'-GGT-GAA-GCT-3' | 3 | 0.944 | 0.081 |
| ZFA 188 | 139 | 122 | 140 | T | 5'-GGT-GAA-GCT-3' | 3 | 1.176 | 0.125 |
| ZFA 189 | 139 | 124 | 140 | T | 5'-GGT-GAA-GCT-3' | 3 | 1.800 | 0.124 |
| ZFA 190 | 139 | 123 | 140 | T | 5'-GGT-GAA-GCT-3' | 3 | 2.189 | 0.234 |
| ZFA 191 | 139 | 116 | 140 | T | 5'-GGT-GAA-GCT-3' | 3 | 2.431 | 0.090 |
| ZFA 192 | 98  | 103 | 67  | B | 5'-GTA-CTT-CGC-3' | 1 | 1.274 | 0.034 |
| ZFA 193 | 61  | 68  | 67  | B | 5'-GTA-GTT-GGC-3' | 3 | 1.056 | 0.098 |
| ZFA 194 | 10  | 32  | 47  | S | 5'-GTA-GTT-GGC-3' | 3 | 0.854 | 0.028 |
| ZFA 195 | 91  | 101 | 69  | B | 5'-GTC-CTA-CAG-3' | 1 | 1.132 | 0.035 |

|         |     |     |     |   |                    |   |       |       |
|---------|-----|-----|-----|---|--------------------|---|-------|-------|
| ZFA 196 | 81  | 65  | 66  | B | 5' -GTG-GAC-ACT-3' | 2 | 1.387 | 0.028 |
| ZFA 197 | 73  | 61  | 66  | B | 5' -GTG-GGC-GCC-3' | 3 | 1.104 | 0.036 |
| ZFA 198 | 6   | 26  | 49  | S | 5' -GTG-GGC-GCC-3' | 3 | 0.984 | 0.055 |
| ZFA 199 | 66  | 82  | 68  | B | 5' -GTT-AGA-GTG-3' | 2 | 1.683 | 0.046 |
| ZFA 200 | 138 | 119 | 111 | T | 5' -GTT-AGA-GTG-3' | 2 | 2.872 | 0.107 |
| ZFA 201 | 12  | 20  | 50  | S | 5' -GTT-GAG-GGT-3' | 3 | 0.671 | 0.015 |
| ZFA 202 | 140 | 136 | 111 | T | 5' -GTT-GAG-GGT-3' | 3 | 3.477 | 0.076 |
| ZFA 203 | 140 | 113 | 111 | T | 5' -GTT-GAG-GGT-3' | 3 | 4.735 | 0.489 |
| ZFA 204 | 101 | 71  | 68  | B | 5' -GTT-GCA-CTA-3' | 2 | 1.009 | 0.043 |
| ZFA 205 | 73  | 70  | 68  | B | 5' -GTT-GCG-GCC-3' | 3 | 5.065 | 0.290 |
| ZFA 206 | 6   | 23  | 50  | S | 5' -GTT-GCG-GCC-3' | 3 | 1.232 | 0.014 |
| ZFA 207 | 83  | 103 | 104 | B | 5' -TAG-CTT-AGC-3' | 0 | 0.849 | 0.100 |
| ZFA 208 | 70  | 59  | 104 | B | 5' -TAG-GGA-GCG-3' | 2 | 2.185 | 0.068 |
| ZFA 209 | 3   | 20  | 56  | S | 5' -TGA-GAG-GAG-3' | 2 | 1.704 | 0.068 |
| ZFA 210 | 86  | 105 | 105 | B | 5' -TGA-TGA-ATA-3' | 0 | 1.001 | 0.030 |

See legend to **Supplementary Table 1** online for descriptive detail pertaining to each of this table's columns.

In addition, the original source of the modules used to construct each array (B=Barbas group,<sup>1</sup> S=Sangamo Biosciences,<sup>2,3</sup> and T=Toolgen, Inc<sup>4</sup>.) is indicated. Because the Zinc Finger Consortium Modular Assembly Kit 1.0 includes more than one module for certain subsites,<sup>3</sup> we were able to construct 168 zinc finger arrays that could potentially recognize the 104 different target sites. Additional details regarding the construction of the B2H zinc finger expression plasmids and the B2H binding site reporter plasmids are provided in **Supplementary Methods** online. Fold-activation of transcription in the B2H assay was determined for each zinc finger array using  $\beta$ -galactosidase assays as previously described.<sup>5</sup>  $\beta$ -galactosidase assays for each zinc finger array were performed a minimum of four times and means and standard errors of the mean are shown. The expression of all zinc finger arrays that failed to activate transcription by more than 1.57-fold in the B2H assay were verified by Western blot using a monoclonal antibody which detects a FLAG epitope present on all arrays (data not shown).

References for Supplementary Table 2:

1. Mandell, J.G. & Barbas, C.F., 3rd Zinc Finger Tools: custom DNA-binding domains for transcription factors and nucleases. *Nucleic Acids Res* **34**, W516-523 (2006).

2. Liu, Q., Xia, Z., Zhong, X. & Case, C.C. Validated zinc finger protein designs for all 16 GNN DNA triplet targets. *J Biol Chem* **277**, 3850-3856 (2002).
3. Wright, D.A. et al. Standardized reagents and protocols for engineering zinc finger nucleases by modular assembly. *Nat Protoc* **1**, 1637-1652 (2006).
4. Bae, K.H. et al. Human zinc fingers as building blocks in the construction of artificial transcription factors. *Nat Biotechnol* **21**, 275-280 (2003).
5. Cornu, T.I. et al. DNA-binding Specificity Is a Major Determinant of the Activity and Toxicity of Zinc-finger Nucleases. *Mol Ther* (2007).

### **Supplementary Discussion:**

#### *Small-scale surveys suggest a low success rate for modular assembly*

Motivated by a desire to use ZFNs for genome modification, our labs constructed the 36 zinc finger arrays listed in **Supplementary Table 1** online. These arrays are highly biased for GXX subsites, and collectively include 22 3-GXX arrays, 8 2-GXX arrays, 2 1-GXX arrays and 4 arrays without GXX subsites. Using three different assays to test for function (see legend to **Supplementary Table 1** online), seven arrays were deemed functional. Six of these sites were composed of three GXX subsites and one was composed of two GXX subsites. Since six of the seven arrays were only tested by EMSA, it is difficult to extrapolate how many of these arrays would function *in vivo* when challenged with the diverse sequence targets present in a genome.

#### *The B2H assay accurately identifies zinc finger arrays that fail to show ZFN function in human cells*

In previously published studies from our groups, we observed a general correlation between failure to activate in the B2H assay and failure to show ZFN function in human cells.<sup>1</sup> To further assess this correlation, we tested the activities of 23 ZFNs using a human cell-based episomal homologous recombination (HR) assay (**Supplementary Methods** online). The zinc finger arrays in these 23 ZFNs each activated transcription to different levels in the B2H system ranging from 0.85- to 5.07-fold. As shown in **Supplementary Fig. 4** online, we found that zinc finger arrays which activated transcription by 1.57-fold or less in the B2H system all failed to show significant activity as ZFNs in human cells (nine out of nine ZFNs tested; pink bars in **Supplementary Fig.**



4 online). Conversely, many (although not all) of the zinc finger arrays which activated transcription by >1.57-fold in the B2H system showed significant activity as ZFNs in the episomal repair assay (light blue bars with red asterisks in **Supplementary Fig. 4** online). We conclude that zinc finger arrays that activate transcription by 1.57-fold or less in the B2H system are unlikely to function as ZFNs in human cells and we used this threshold level to interpret the results of our experiments.

*Predicted failure rates for identifying zinc finger arrays needed to engineer a ZFN pair*

Analysis of our results shows that modular assembly is far less effective for target sites composed of two, one, or no GXX subsites (71%, 88% and 100% failure rates, respectively; **Fig. 1a**) compared with those that contain three GXX subsites (41% failure rate; **Fig. 1a**). Because ZFNs function as dimers, the failure rates for making a ZFN pair will therefore be ~65%, ~92%, ~99%, and 100% for ZFN targets composed of pairs of 3-GXX, 2-GXX, 1-GXX, and 0-GXX 9 bp “half-sites”, respectively. These failure rates are calculated by multiplying estimated success rates for each monomer in the ZFN pair and subtracting this percentage from 100%.

*Alternative selection-based strategies for engineering multi-finger arrays*

A fundamental flaw with the modular assembly method (and a likely cause of its low success rate) is its assumption that zinc finger domains behave as independent modular units. A number of studies have shown that zinc fingers can cross over and interact with adjacent fingers and neighboring finger binding sites.<sup>2-5</sup> Various engineering strategies have been described in the literature that account for these context-dependent effects on

zinc finger DNA-binding. Greisman and Pabo first described a sequential optimization strategy in which combinations of fingers that work well together are identified using serial selections from randomized libraries.<sup>6</sup> Isalan, Klug, and Choo described a “bi-partite” optimization strategy in which “halves” of a three-finger domain are first optimized by randomization and selection and then joined together to create a final protein.<sup>7</sup> Finally, Joung and colleagues described a domain shuffling approach in which pools of fingers are first identified for each subsite in parallel and then shuffled together to create a recombined library for use in a final stringent selection.<sup>8</sup> A limitation of all of these different approaches is that they require specialized expertise in the construction of multiple very large randomized libraries and in the interrogation of these libraries using selection methods.

#### References for Supplementary Discussion:

1. Cornu, T. I. et al. DNA-binding Specificity Is a Major Determinant of the Activity and Toxicity of Zinc-finger Nucleases. *Mol Ther* (2007).
2. Isalan, M., Choo, Y. & Klug, A. Synergy between adjacent zinc fingers in sequence-specific DNA recognition. *Proc Natl Acad Sci U S A* **94**, 5617-21 (1997).
3. Isalan, M., Klug, A. & Choo, Y. Comprehensive DNA recognition through concerted interactions from adjacent zinc fingers. *Biochemistry* **37**, 12026-33 (1998).
4. Elrod-Erickson, M., Rould, M. A., Nekludova, L. & Pabo, C. O. Zif268 protein-DNA complex refined at 1.6 Å: a model system for understanding zinc finger-DNA interactions. *Structure* **4**, 1171-80 (1996).

5. Wolfe, S. A., Grant, R. A., Elrod-Erickson, M. & Pabo, C. O. Beyond the "recognition code": structures of two Cys2His2 zinc finger/TATA box complexes. *Structure (Camb)* **9**, 717-23 (2001).
6. Greisman, H. A. & Pabo, C. O. A general strategy for selecting high-affinity zinc finger proteins for diverse DNA target sites. *Science* **275**, 657-61 (1997).
7. Isalan, M., Klug, A. & Choo, Y. A rapid, generally applicable method to engineer zinc fingers illustrated by targeting the HIV-1 promoter. *Nat Biotechnol* **19**, 656-60 (2001).
8. Hurt, J. A., Thibodeau, S. A., Hirsh, A. S., Pabo, C. O. & Joung, J. K. Highly specific zinc finger proteins obtained by directed domain shuffling and cell-based selection. *Proc Natl Acad Sci U S A* **100**, 12271-6 (2003).

## **Supplementary Methods:**

### *Construction of B2H zinc finger expression vectors and reporter strains*

104 B2H reporter strains each harboring a single copy target site-reporter plasmid were constructed as previously described.<sup>1</sup> B2H expression vectors encoding different three-finger arrays were constructed essentially as previously described<sup>1</sup> using the Zinc Finger Modular Assembly Kit 1.0 which includes 141 modules made by the Barbas group, Sangamo Biosciences, and Toolgen, Inc.<sup>1</sup> For each target site, we made three-finger arrays using modules from the Barbas, Sangamo, and Toolgen collections but we did not mix and match modules across these different sets. We chose not to make “cross-platform” arrays because: (1) the Barbas website software does not advocate use of their modules with others,<sup>2</sup> (2) the Toolgen group discovered that their human zinc fingers worked best with one another and not as well with other engineered modules,<sup>3</sup> and (3) the Sangamo modules are position-specific and have linkers joining them that differ from the canonical TGEKP linker used by the Barbas and Toolgen modules.<sup>4</sup> 15 of the arrays we constructed were toxic when expressed in the B2H assay and these proteins were not included in our analysis. After setting aside these toxic proteins, we characterized the remaining 168 zinc finger arrays. All expression and reporter plasmids were confirmed to be correct by DNA sequencing prior to use in B2H assays.

### *B2H assays, verification of protein expression, and re-verification of DNA sequences*

The activities of three-finger arrays were tested in the B2H assay by co-transforming a target site reporter strain with a B2H zinc finger array-Gal1 1P expression vector and a compatible plasmid encoding an *E. coli* RNA polymerase alpha-Gal4 hybrid protein.<sup>1</sup>

Fold-activation was calculated as the ratio of the level of  $\beta$ -galactosidase (*lacZ*) reporter activity in the presence and absence of the zinc finger array as previously described.<sup>5</sup> All  $\beta$ -galactosidase measurements were performed at least four independent times. The expression of each zinc finger array that failed to activate transcription by more than 1.57-fold in the B2H assay was verified by performing Western blot on cell extracts from the  $\beta$ -galactosidase assays using a monoclonal antibody against the FLAG epitope present on all zinc finger array-Gal11P fusion proteins. For zinc finger arrays that exhibited less than 1.57-fold transcriptional activation in the B2H assay, we re-sequenced the zinc finger coding sequences and the reporter plasmid binding sites from the same cells used for  $\beta$ -galactosidase assays to re-confirm the identities of the zinc finger recognition helices and binding sites tested in these cells. We performed this additional re-sequencing control on >80% of our samples (94 of the 115 zinc finger array/binding site combinations) that were negative in the B2H assay and found that all helices and binding sites were correct as expected.

#### *Plant single-strand annealing (PSSA) assays*

Zinc finger arrays were fused to the *FokI* nuclease domain and the resulting ZFNs were transiently expressed in tobacco protoplasts. Plasmids encoding these ZFNs were co-transformed with a target plasmid carrying a non-functional  $\beta$ -glucuronidase (*GUS*) gene. The *GUS* gene was rendered non-functional by a direct duplication of part of its coding sequence. Between the direct repeats, a recognition site was inserted for the given ZFN being tested. After expression of the ZFN and cleavage of the *GUS* reporter, repair by single strand annealing can restore *GUS* function. This can be measured by standard

GUS activity assays. We routinely observe GUS activity 25-fold above background when the assay is performed with a ZFN based on the transcription factor Zif268.

*Episomal recombination (HR) assay in human cells*

For the episomal HR assay, 293T cells in 24-well plates were transfected by calcium phosphate precipitation with 20 ng of the respective target plasmid, 1  $\mu$ g of the donor plasmid (pUC.Zgfp/REx), and 100 ng of a CMV-driven endonuclease expression vector encoding the ZFNs, I-SceI (pRK5.LHA-Sce1) or a control vector (pCMV.Luc). Two days after transfection, 50,000 cells were analyzed by flow cytometry (FACSCalibur, BD Bioscience) to determine the percentage of EGFP-positive cells. The number of DsRedExpress (REx)-positive cells was used to normalize for transfection efficiency. All experiments were repeated at least three times. ZFN activity is indicated as the fraction of EGFP-positive cells relative to the number of EGFP-positive cells measured in the presence of I-SceI.

*Revisions to the Zinc Finger Consortium website*

We have previously described ZiFiT, a web-based software program that enables users to rapidly identify potential zinc finger target sites within genes of interest.<sup>6</sup> ZiFiT identifies target sites for which zinc finger arrays might be made using modular assembly and the Zinc Finger Consortium Modular Assembly Kit 1.0.<sup>1</sup> Given the results of this current study, we have revised the ZiFiT program by adding the following section to its instructions:

## Scoring

To assess the effectiveness of modular assembly, we generated a large number of zinc finger arrays and tested their activity using a bacterial cell-based two-hybrid (B2H) assay (Ramirez et al., 2008). In the B2H assay, productive interaction of a zinc finger array with its cognate binding site activates transcription of a linked reporter gene. A total of 168 three finger arrays were assembled that recognize 104 different target DNA sites that varied in their GXX, AXX, CXX, and TXX subsite composition. Transcriptional activation of >1.57-fold over negative controls was determined to be indicative of target site recognition by a given protein. After measuring the activity of the 168 zinc finger arrays, it was found that the subsite composition of binding sites critically affected success rates. Modular assembly was far less effective for target sites composed of one or no GXX subsites (12% and 0% success rates, respectively) compared with those that contain three or two (59% and 29% success rates, respectively). Based on these results, we provide users of ZiFiT with an approximation of the likelihood that a given three finger protein will recognize its target. For example, three finger proteins comprised of three GXX subsites will receive a score of 0.59, reflecting the success rate observed in our survey. Most users will be interested in the likelihood that two arrays will function together as a ZFN. This can be approximated by multiplying the success rate of individual arrays. For example, the likelihood of success that a ZFN with all GXX subsites will recognize its target is  $0.59 \times 0.59 = 0.35$  or 35%. Because multiple modules are often

available for given subsites, investigators may increase their likelihood of success by making multiple different proteins against a single target. One note of caution: the scoring function is a prediction for the activity of a given three finger array in the B2H assay; the protein may behave differently when tested for activity in a eukaryotic cell.

We have also revised the output that ZiFiT currently provides to users to include guidance about the likelihood of success for different target DNA binding sites.

#### References for Supplementary Methods:

1. Wright, D. A. et al. Standardized reagents and protocols for engineering zinc finger nucleases by modular assembly. *Nat Protoc* **1**, 1637-52 (2006).
2. Mandell, J. G. & Barbas, C. F., 3rd. Zinc Finger Tools: custom DNA-binding domains for transcription factors and nucleases. *Nucleic Acids Res* **34**, W516-23 (2006).
3. Bae, K. H. et al. Human zinc fingers as building blocks in the construction of artificial transcription factors. *Nat Biotechnol* **21**, 275-80 (2003).
4. Liu, Q., Xia, Z., Zhong, X. & Case, C. C. Validated zinc finger protein designs for all 16 GNN DNA triplet targets. *J Biol Chem* **277**, 3850-6 (2002).
5. Thibodeau, S. A., Fang, R. & Joung, J. K. High-throughput beta-galactosidase assay for bacterial cell-based reporter systems. *Biotechniques* **36**, 410-5 (2004).
6. Sander, J. D., Zaback, P., Joung, J. K., Voytas, D. F. & Dobbs, D. Zinc Finger Targeter (ZiFiT): an engineered zinc finger/target site design tool. *Nucleic Acids Res* **35**, W599-605 (2007).
